# Supplementary material
Source: Research Square preprint supplement (doi:10.21203/rs.3.rs-9197685/v1)
Supplement: Supplementary file 1 [file bdc2dc0ccd499a6dbc8baa9e.docx]

**SUPPLEMENTARY MATERIALS**

# 1.Strains, plasmids and media used in the study

The laccase producing white-rot fungus *Trametes polyzona* MUCL 38443 was supplied through EU-FP6 SMI-IP (IP: 505899). *T. polyzona* pellets to be used in RNA isolation in subsequent steps were grown in LSK media to induce laccase expression. To achieve this, 1 ml of spore suspension was inoculated to 100 ml of LSK medium in 500 ml Erlenmeyer flask. After incubation at 28°C for 10 days with 150 rpm orbital shaking, mycelial pellets were collected by filtration, washed with diethylpyrocarbonate (DEPC)-treated water and immediately frozen in liquid nitrogen.

*Escherichia coli* DH5α and *Escherichia coli* Top 10F’ cells were used for sub-cloning studies and were grown in low-salt Luria-Bertani (LB) medium at 37ºC. The pGEM®-T Easy vector (Promega) was used for subcloning and long-term storage of PCR fragments.

Wild-type *Pichia pastoris* (*Komagataella phaffii*)X-33 strain (Invitrogen™), is a methylotrophic yeast used as the heterologous expression host. All media and protocols related to Pichia pastoris were performed according to the EasySelect™ Pichia Expression Kit Manual (Invitrogen). *P. pastoris* X-33 was maintained in yeast extract-peptone-dextrose (YPD) medium while transformants of *P. pastoris* were screened on yeast extract-peptone-dextrose-sorbitol YPDS medium. Additionally, buffered glycerol-complex (BMGY) medium was used to increase biomass before induction of laccase production in buffered methanol-complex (BMMY) medium. pPICZ B (Invitrogen) expression vector was used for genomic integration of *TpLcc3* gene into the *P. pastoris* genome. pPICZ B vector contains Zeocin™ selection marker which provides selection of transformants of both *E. coli* and *P. pastoris*, and an inducible AOX1 promoter (*AOX1P*).

**Table S1.** Strains and genotypes of organisms used in this study

| **Strain** | **Genotype** |
| --- | --- |
| *Trametes polyzona* MUCL 38443 | Wild-type |
| *E.coli* Top 10F’ | *lacIq Tn10(Tetr), mcrA Δ(mrr-hsdRMS-mcrBC), f80lacZΔM15 ΔlacX74, deoR, recA1, araD139*  *Δ(ara-leu)7697,galU, galK, rpsL (Strr), endA1, nupG* |
| *E.coli* DH5α | *F–Φ80*lac*ZΔM15 Δ(*lac*ZYA-*arg*F) U169*rec*A1* end*A1*hsd*R17 (rK–, mK+)*pho*A*sup*E44 λ–*thi*-1*gyr*A96*rel*A1* |
| *Pichia pastoris* X-33 | Wild-type |

**Table S2.** Detailed composition of all media used in this study.

| **Media** | **Components** | **Concentration per 1L** | **Supplier** |
| --- | --- | --- | --- |
| **LSK** | D-Glucose  Peptone  KH2PO4  MgSO4  CuSO4,  MnSO4  Thiamine-HCl | 5% (w/v)  1.7 % (w/v)  2 g % (w/v)  4.15 mM  0.125 mM  0.33 mM  10 mg/L | Merck  Biolife  Merck  Merck  Merck  Merck  Sigma-Aldrich |
| **YPDS** | Yeast Extract  Peptone  D-Glucose  Sorbitol | 1% (w/v)  2 % (w/v)  2 % (w/v)  1M | Biolife  Biolife  Merck  Merck |
| **BMGY** | Yeast Nitrogen Base  Yeast Extract  Peptone  Biotin  Glycerol  Potassium phosphate buffer (pH 6.0)a | 1.34 % (w/v)  1 % (w/v)  2% (w/v)  0.04 % (w/v)  1% (w/v)  100 mM | Sigma-Aldrich  Biolife  Biolife  Sigma-Aldrich  Fluka™  Merck |
| **BMMY**  **(Optimized)** | Yeast Nitrogen Base  Yeast Extract  Peptone  Biotin  Methanol  Copper (II) Sulfate  L-Alanine  Potassium phosphate buffer (pH 6.0)a | 1.34 % (w/v)  1 % (w/v)  2% (w/v)  0.04% (w/v)  1.5% (v/v)  0.8 mM  0.4 % (w/v)  100 mM | Sigma-Aldrich  Biolife  Biolife  Sigma-Aldrich  Merck  Merck  Applichem  Merck |

**aRepresents Buffer pH**

# 2. Cloning of full-length TpLcc3 laccase gene and cDNA

The total RNA was isolated from *T. polyzona* MUCL 38443 mycelia using the RNeasy Plant Mini Kit (QIAGEN). In order to characterize TpLcc3-encoding gene, 5’- and 3’- ends of *tplcc3* were identified by employing 5’ and 3’ rapid amplification of cDNA ends (RACE) using BD SMARTer™ RACE cDNA Amplification Kit (Clontech). Isolated total RNA was used to synthesize RACE-ready cDNA; afterwards, 5’ and 3’ ends of *tplcc3* was amplified and characterized with RACE and nested RACE reactions. 5’- and 3’-RACE primers were designed according to partial cDNA sequence of *tplcc3* obtained in previous study (Pinar et al, 2017).

Genomic DNA was isolated from *T. polyzona* MUCL 38443 mycelia using Fast DNA Spin Kit (MPBio) to be used as template in the amplification full-length *tplcc3*. Full-length *tplcc3* gene was amplified

Full-length *tplcc3* gene and full-length *tplcc3* cDNA were amplified using SeqAmp DNA Polymerase (Clontech) according to manufacturer’s recommendations using genomic DNA and total cDNA as template, respectively. PCR conditions were set as 1 min for initial denaturation, 30 cycles of 98°C for 10 s, 58°C for 15 s, 68°C for 3 min for *tplcc3* gene and 1 min for *tplcc3* cDNA; and final extension at 68°C for 5 min.

All gene specific primers were showed in **Table S3**. RACE primers were designed according to conserved partial sequence of *tplcc3* (**Figure S1**). All RACE and PCR products were purified from agarose gels using NucleoSpin® Gel and PCR Clean-up kit (Macherey-Nagel). A’- overhangs were added to PCR products by briefly treating them with *Taq* polymerase (Intron) in the presence of dATP at 72℃ for 30 min. Then, products were ligated to pGEM®-T Easy Cloning Vector (Promega) and recombinant vectors were used to transform chemically-competent *E. coli* DH5α or Top10F’ cells. At last, ampicillin-resistant white transformants were selected and plasmids isolated from these transformants were sequenced with ABI PRISM® 3100 Genetic Analyzer.

**CCAGATTTTGGCGGGGCAGCGTAATCCTTTGTTTTGAACGCCAAATCGACCCTGGGGCCAATAACGGAAACCGGCAAACCCCCCAATTTCGCCAGGCCGGGTTCGGGGGCCGGGTCAACTCCCGCCTTCCTCCGCTACAAGGGAGCCCGGGCTATTGACCCGACGACCACTCAAACACCTTCCGTCAACCCACTCGTTGAGACGAACCTCCACCCCACTCACACGCACGCCGGTGCCTGGTCGTCCCACACCCGGAGGCGTGGACAAGGCGATCAACCTCGCTTTCAACTTTAATGGGTCCAACTTCTTCATCAACGACGCGACGTTCACACCACCCAGCGTCCCCGTGCTGCTCCAAATTCTGAGCGGTGCGCAGACCGCTCAGGACCTCCTGCCCCCGGGCTCCGTCTACCCTCTCCCGGGCCACTCCTCCATTGAGCTCACGCTGCCCGCGACGGCGATGGCCCCAGGCGCGCCCCACCCCTTTCACCTGCATGGTCACGTCTTCGCCGTCGTCCGCAGCGCGGGCAGCACCGAGTACAACTACAACGACCCGATCTTCCGCGACGTCGTGAACACGGGCACGCCCGCGGCCAACGACAACGTCACGATCCGCTTCCGGACGGACAACCCCGGCCCGTGGTTCCTCCACTGCCACATAGTCTTCCA**

**Figure S1.** Partial cDNA sequence of *tplcc3* from *Trametes polyzona* MUCL 38443.

**Table S3.** Gene specific primers used in the RACE reactions and full-length *tplcc3* synthesis.

| Primer | | Sequence |
| --- | --- | --- |
| *tplcc3* RACE Reverse | 5’-GGAAGGTGTTTGAGTGGTCGTCGGGTC-3’ | |
| *tplcc3* Nested RACE Reverse | 5’-GCCGGTTTCCGTTATTGGCCCCAGGG-3’ | |
| *tplcc3* RACE Forward | 5’-CCTGCATGGTCACGTCTTCGCCGTCG-3’ | |
| *tplcc3* Nested RACE Forward | 5’- TTCCGCGACGTCGTGAACACGGGCAC-3’ | |
| *tplcc3* Forward (*Eco*RI) | 5’ − CCGGGAATTCAGCATGGTTGGCTTGCAGCGTTTCGGA − 3’ | |
| *tplcc3* Reverse (*Not*I) | 5’ − AATGCGGCCGCCTACCCCGTCCGCGTTCACTG − 3’ | |


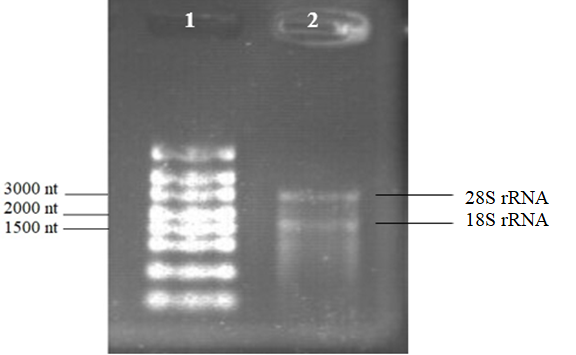


**Figure S2.** Total RNA isolated from *Trametes polyzona* MUCL 38443. **Marker RNA:** Riboruler High Range RNA Ladder (Thermo Scientific).


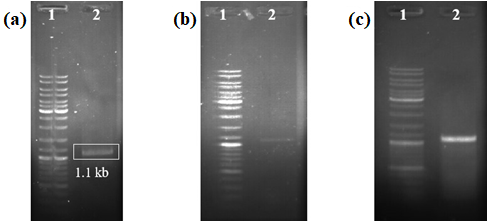


**Figure S3. a)** 1.1-kb 5’-RACE products obtained using *tplcc3* RACE reverse primer and the Universal Primer Mix (UPM). **(b)** 5’-RACE product after purification. **(c)** 1.1-kb 5’-RACE products after A-tailing. Marker DNA: Gene RulerTM DNA Ladder Mix (Thermo Scientific).


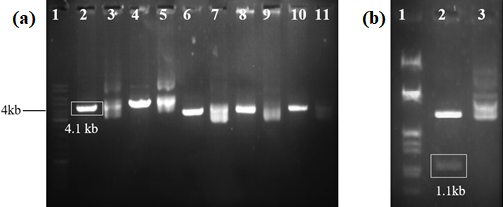


**Figure S4. (a)** *PstI* linearization of plasmid DNA isolated from selected white clones. **Lane 1:** Gene Ruler™ DNA Ladder Mix (Thermo Scientific); **Lanes 2,4,6,8 and 10:** *Pst*I-cut plasmids; **Lanes 3,5,7,9 and 11:** Uncut plasmids. **(b)** Plasmid DNAs digested with *EcoR*I. **Lane 1:** Lambda DNA/*EcoR*I+*Hind*III Marker (Thermo Scientific); **Lane 2:** *EcoR*I digested plasmid; **Lane 3:** Uncut plasmid.


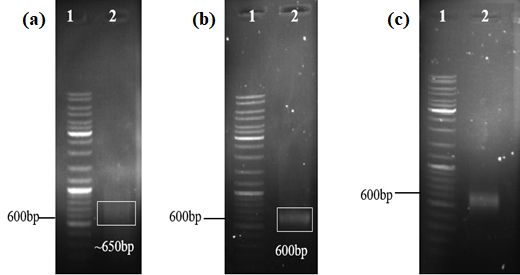


**Figure S5. a)** 650 bp 3' RACE products obtained by using the gene specific forward primer ‘*tplcc3* RACE Forward’ and the universal primer (UPM). **(b)** 600bp 3' Nested RACE products obtained by using the gene specific forward primer ‘*tplcc3* Nested RACE Forward’ and the Universal Primer Short. **(c)** 600-bp 3’ Nested RACE products after A-tailing with *Taq* polymerase. **Marker DNA:** Gene RulerTM DNA Ladder Mix (Thermo Scientific).

*
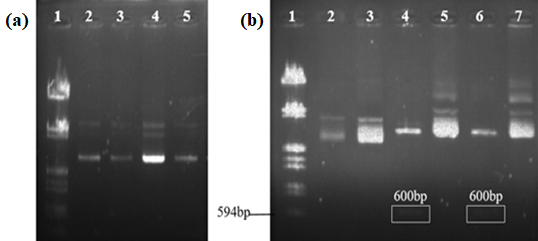
*

**Figure S6. (a)** Plasmid DNA isoalation from white colonies selected via blue/white screening. **(b)** Plasmids DNAs digested with *Eco*RI. **Lane 1:** Lambda DNA/*Eco*RI+*Hind*III Marker (Thermo Scientific); **Lanes 2, 4 and 6:** *Eco*RI digested plasmid**; Lanes 3, 5 and 7:** Uncut plasmids. **Marker DNA:** Gene RulerTM DNA Ladder Mix (Thermo Scientific).

# 3. Bioinformatic analysis


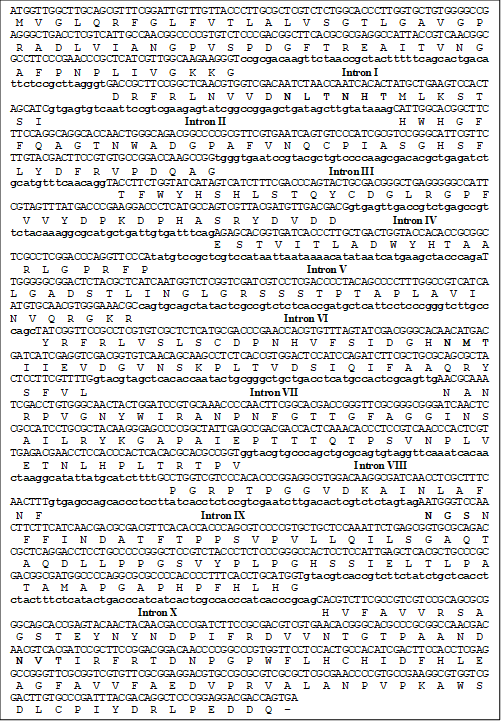


**Figure S7.** Nucleotide sequence and deduced amino acid sequence of the *tplcc3* gene from *Trametes polyzona* MUCL 38443. The 10 putative introns are indicated in lowercase type and numbered (I-X).


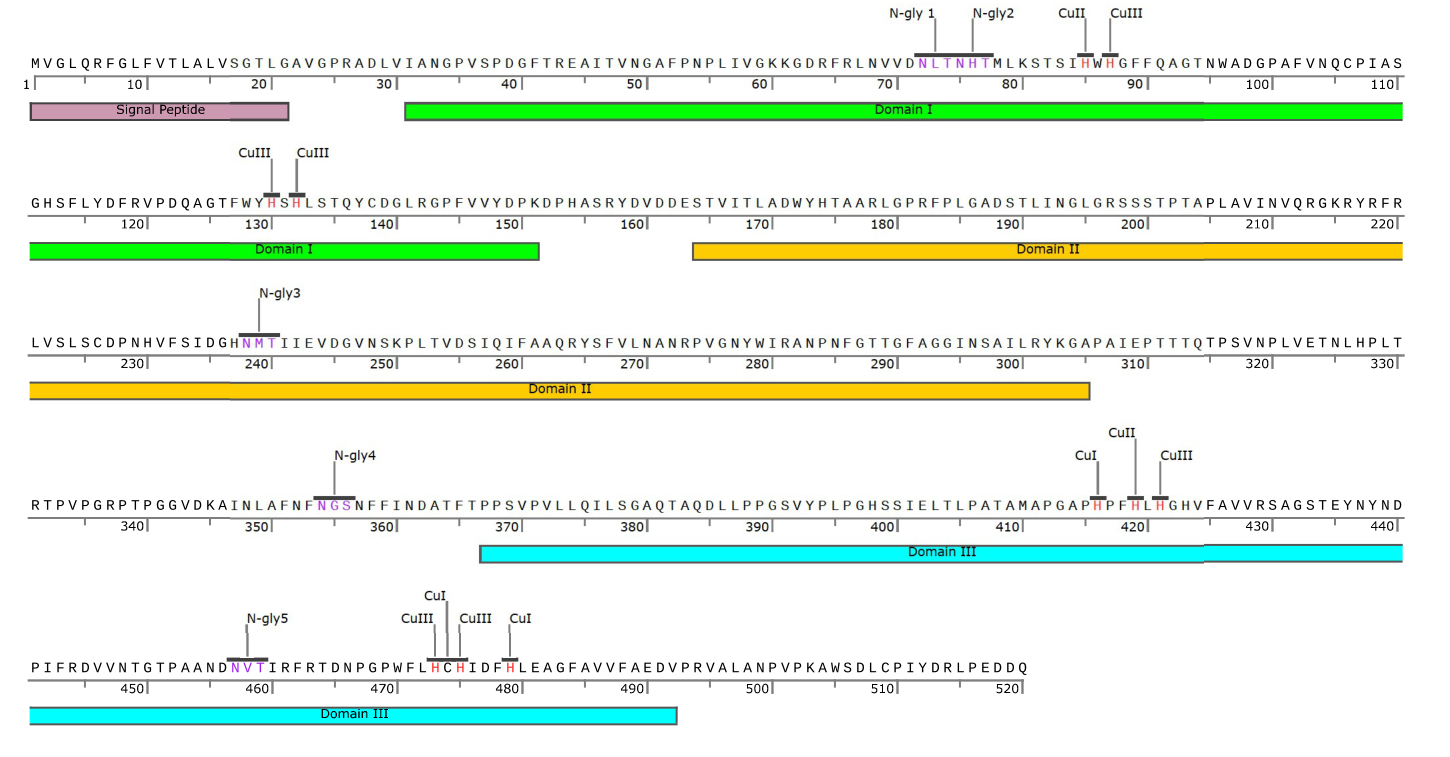


**Figure S8.** Full-length Tplcc3 protein. Potential N-glycosylation sites with the consensus sequence Asn-X-Thr/Ser sites are marked. 10 histidine residues and 1 cysteine residue interacting with Type (I), Type (II) and Type (III) coppers are highlighted as red. Signal peptide, N-terminal domain I, domain II and C-terminal domain III are shown as pink, green, yellow and cyan, respectively.


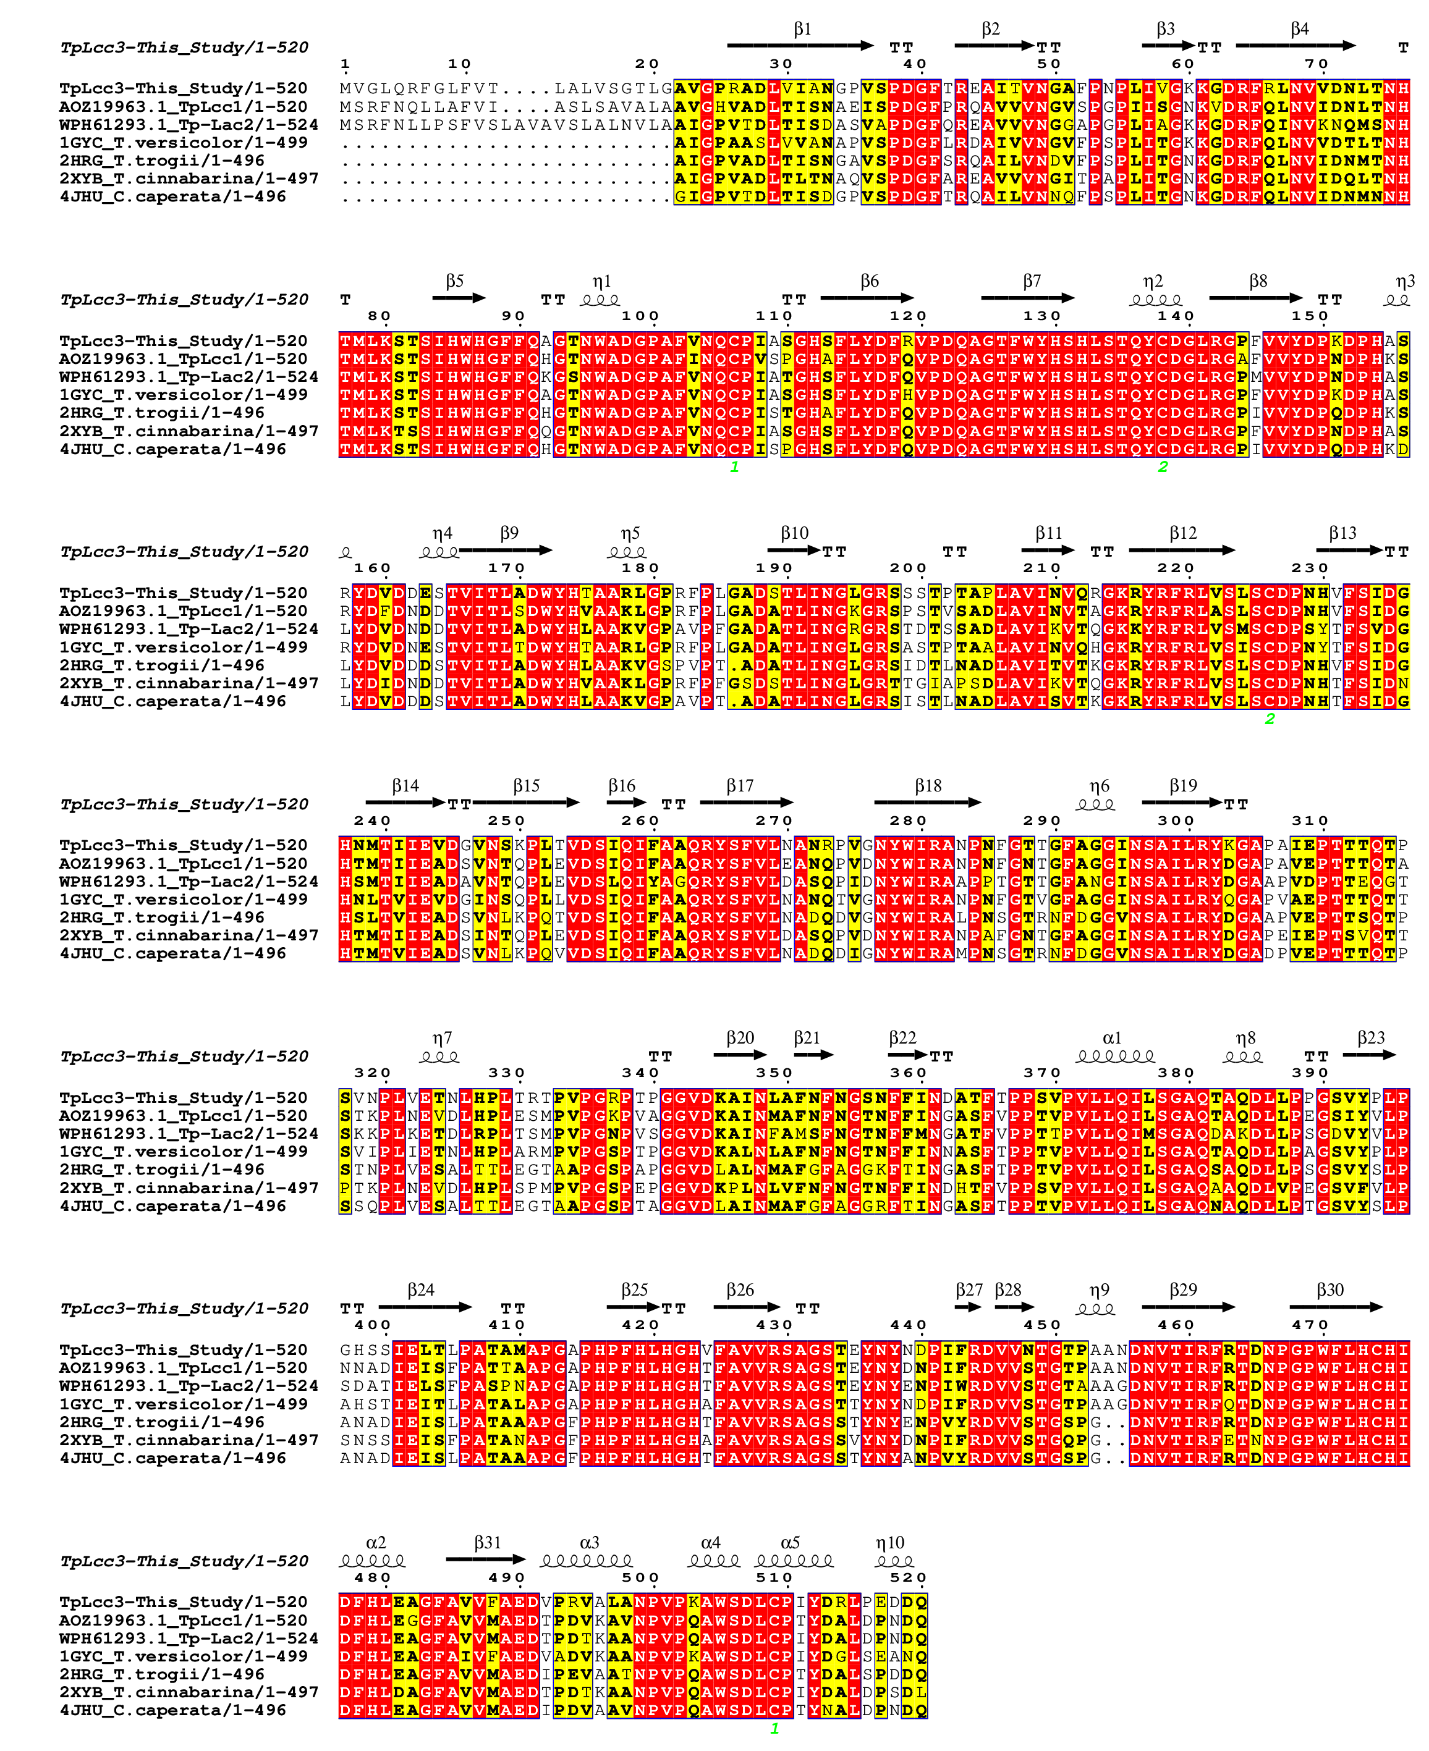


Figure S 9. Multiple sequence alignment of Tplcc3 laccase and laccases from *T. polyzona* MUCL38443 and other well studied laccases and the corresponding secondary structure analysis generated using the Easy Sequencing in PostScript (ESPript 3) tool.

# 4. Heterologous expression of TpLcc3 in *Pichia pastoris*

For heterologous expression of tplcc3 laccase in *Pichia pastoris, tplcc3* cDNA was subcloned to *Pichia expression* vector pPICZ B (Invitrogen). After ligating the digested *tplcc3* into the pPICZ B vector with T4 ligase, the ligation product was transformed into chemically competent *E. coli* Top10F’ cells. Correct insertion of the *tplcc3* gene was confirmed through *Eco*RI and *Not*I digestion and DNA sequencing. The *tplcc3*-carrying pPICZ B vector was then linearized with PmeI to integrate it into the 5’AOX1 region of the host genome and transformed into P. pastoris X-33 cells using the EasyComp™ Transformation Kit. Transformants were screened on Zeocin-supplemented YPD agar plates and further selected on Minimal Methanol Agar plates with ABTS. After 3 days at 30°C, transformants expressing laccase were identified by the green zone they produced. The top laccase-producing transformant was further selected by monitoring laccase activity in methanol-containing BMMY broth after 3 days of incubation at 28°C with shaking, with methanol added daily to a final concentration of 0.5% (v/v).

In order to increase the laccase production, the top laccase-producing transformant was grown in 25 mL BMGY medium at 28°C and 250 rpm until OD600 reached 2.0–6.0. After centrifugation, cells were resuspended in 25 mL BMMY medium (OD600 = 1.0). The effects of methanol (0–1.5% v/v), copper sulfate (0–1.2 mM), and L-alanine (0–1% w/v) concentrations were then assessed. Methanol supplementation at 1.5% markedly enhanced enzyme activity, yielding a 23.5-fold increase compared with the standard 0.5% condition. Copper addition at 0.8 mM CuSO₄ enhanced activity 1.84-fold, supplementation with 0.4% L-alanine resulted in a 1.07-fold enhancement, likely by counteracting methanol-induced acidification, as noted previously. Under optimized conditions (1.5% methanol, 0.8 mM CuSO₄, 0.4% L-alanine, 28°C, 250 rpm, 7 days), rTpLcc3 activity reached 1,159 U L⁻¹, representing an overall 15.15-fold improvement relative to the unoptimized culture.


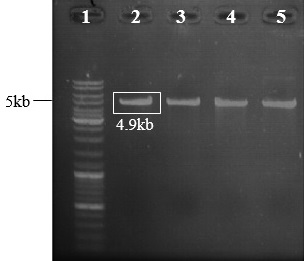


**Figure S10.** 4.9 kb Linearized *tplcc3*/pPICZB with *Pme*I (*Mss*I) in order to promote transformation into competent *Pichia pastoris* X-33 cells. **Marker DNA:** Gene RulerTM DNA Ladder Mix (Thermo Scientific).

**Figure S11.** Screening of TpLcc3-producing transformants in BMMY broth after 3 days of incubation.

**Figure S12.** Effect of methanol concentrations on activity of recombinant laccase TpLcc3.

**Figure S13.** The effect of different CuSO4 concentrations on activity of recombinant laccase TpLcc3.

**Figure S14.** The effect of different L-alanine concentrations on activity of recombinant laccase TpLcc3.

# 5. Kinetic characterization of recombinant laccase rTpLcc3

**Table S5.** Kinetic parameters of laccases from *Trametes spp*.

| **Laccase Source** | **Substrate** | **Km**  **(µM)** | **kcat**  **(s-1)** | **kcat/ Km**  **(µM-1.s-1)** | **Reference** |
| --- | --- | --- | --- | --- | --- |
| ***Trametes polyzona* 38443 Tplcc3** | **ABTS** | 7.47 | 4307.55 | 576.76 | This study |
|  | **Guaiacol** | 1293.20 | 3877.25 | 3.00 | This study |
|  | **Syringol** | 603.26 | 2091.66 | 3.47 | This study |
| ***Trametes polyzona* 38443 TpLcc1** | **ABTS** | 137.4 | 34380 | 69.67 | Pinar et al. (2017) |
| ***Trametes polyzona* 38443 Tp-Lac2** | **ABTS** | 250 | - | - | Bucchieri et al. 2024) |
| ***Trametes polyzona* WRF03** | **ABTS** | 8.66 | - | - | Ezike et al. (2020) |
| ***Trametes polyzona*WR710–1** | **ABTS** | 150 | 594 | 3.96 | Chairin et al. (2014) |
|  | **Guaiacol** | 1890 | 92.2 | 0.048 | Chairin et al. (2014) |
|  | **Syringol** | 503 | 38.2 | 0.076 | Chairin et al. (2014) |
| ***Trametes pubescens* (LAC1)** | **Guaiacol** | 220 | 136 | 0.6 | Shleev et al. (2007) |
|  | **ABTS** | 50 | 150 | 3 | Shleev et al. (2007) |
| ***Trametes pubescens* (LAC2)** | **Guaiacol** | 120 | 55 | 0.5 | Shleev et al. (2007) |
|  | **ABTS** | 60 | 400 | 6.7 | Shleev et al. (2007) |
| ***Trametes multicolor* MB49** | **ABTS** | 14.1 | 510 | 36.17 | Leitner et al. (2002) |
|  | **Guaiacol** | 436 | 130 | 0.298 | Leitner et al. (2002) |
|  | **Syringol** | 186 | 203 | 1.09 | Leitner et al. (2002) |
| ***Trametes orientalis*** | **ABTS** | 333.3 | 21.81 | 0.065 | Zheng et al. (2017) |
| ***Trametes hirsuta*** | **ABTS** | 20 | 198.29 | 9.92 | Navada et al. (2021) |
|  | **Guaiacol** | 400 | 80.2 | 0.20 | Navada et al. (2021) |

# 6. Decolorization of textile dyes in citrate buffer

**Table S6**. Textile dyes and their maximum absorption wavelengths used in this study.

| **Dye** | **Measurement wavelength** |
| --- | --- |
| Acid Black 194 | 570 nm |
| Reactive Black 5 | 595 nm |
| Malachite Green (Basic Green 4) | 615 nm |
| Crystal Violet (Basic Violet 3) | 590 nm |
| Bismarck Brown (Basic Brown 1) | 457 nm |
| Reactive Red 195 | 542 nm |
